# Supplementary material for: mTORC1 is Required for Brown Adipose Tissue Recruitment and Metabolic Adaptation to Cold
Source: PubMed Central journal article supplement (PMC5120333; doi:10.1038/srep37223), 2016-11-23

## **SUPPLEMENTARY INFORMATIONS**

### **mTORC1 IS REQUIRED FOR BROWN ADIPOSE TISSUE RECRUITMENT AND METABOLIC ADAPTATION TO COLD**

Sébastien M. Labbé<sup>1,2</sup>, Mathilde Mouchiroud<sup>1,2</sup>, Alexandre Caron<sup>1,2</sup>, Blandine Secco<sup>1,2</sup>,  
Elizaveta Freinkman<sup>3</sup>, Guillaume Lamoureux<sup>1,2</sup>, Yves Gélinas<sup>1,2</sup>, Roger Lecomte<sup>4</sup>,  
Yohan Bossé<sup>1</sup>, Patricia Chimin<sup>5</sup>, William T. Festuccia<sup>5</sup>, Denis Richard<sup>1,2</sup>, Mathieu  
Laplante<sup>1,2\*</sup>

## Figure S1

Mice were either kept at thermoneutrality (warm; 30°C) or cold exposed (10°C) for 2 weeks. Acute cold (6-hour at 10°C) exposure was also performed following the thermoneutrality. (A) Angiogenic, oxidative, and lipogenic genes expression in BAT (n=8 for warm; n=5 for acute cold; n=8 for chronic cold; mean +/- SEM; ANOVA; \* P < 0.05; \*\* P < 0.01; \*\*\* P < 0.001). (B) Cumulative food intake during acute cold exposure (n=7-8; mean +/- SEM; t-test; \* P < 0.05; \*\* P < 0.01; \*\*\* P < 0.001). (C) Plasma metabolites following a 6-hour fasting period (n=8-16; mean +/- SEM; t-test; \* P < 0.05; \*\* P < 0.01; \*\*\* P < 0.001). (D) Western blots performed on BAT collected from mice injected with CL316,243 (CL; 2 mg/kg). Mice were fasted during 6 hours before the CL injection (BAT was collected 1 hour following the injection). All gels have been run under the same experimental conditions. (E) Plasma insulin levels 1 hour following the CL injection. (F) Representative PET image showing <sup>18</sup>FDG accumulation in innervated and denervated BAT lobe following chronic cold exposure. (G) Representative H&E staining of innervated and denervated BAT lobe following chronic cold exposure. (H) mtDNA content presented as fold change versus sham-operated mice kept at thermoneutrality (n=4-10; mean +/- SEM; Two-way ANOVA; \*\*\* P < 0.001 vs. Warm; #### P < 0.001 vs. Control).

## Figure S2

Control and Ad-Raptor<sup>KO</sup> mice were either kept at thermoneutrality (warm; 30°C) or cold exposed (10°C) for 2 weeks. Acute cold (6 hours at 10°C) exposure was also performed following the thermoneutrality. (A) Western blots for RAPTOR protein expression in different tissues collected from control or Ad-Raptor<sup>KO</sup> mice. All gels have been run under the same experimental conditions. (B) (Left) Body weight, (middle) epididimal WAT weight and (right) inguinal WAT weight of control and Ad-Raptor<sup>KO</sup> mice. (C) Plasma metabolites following a 6-hour fasting period (n=8-16; mean +/- SEM; Two-way ANOVA; \* P < 0.05; \*\* P < 0.01; \*\*\* P < 0.001 vs. Control-Warm; # P < 0.05; ### P < 0.001 vs. Control; & P < 0.05; && P < 0.01; &&& P < 0.001 vs. KO-Warm). (D) *Ucp1* gene expression in BAT (n=8; mean +/- SEM; Two-way ANOVA; \*\*\* P < 0.001 vs. Warm; ### P < 0.001 vs. Control). (E) Mean SUV time-activity curves of <sup>11</sup>C-acetate in iWAT following a dynamic PET acquisition during (left) acute and (right) chronic cold exposure (n=4-5; mean +/- SEM). Mice received an acute CL injection (2 mg/kg intravenously) 1 minute prior to the PET procedure. (F) Mean SUV time-activity curves of <sup>11</sup>C-acetate in eWAT following a dynamic PET acquisition during (left) acute and (right) chronic cold exposure (n=4-5; mean +/- SEM). Mice received an acute CL injection (2 mg/kg intravenously) 1 minute prior to the PET procedure. (G) *Vegfa* gene expression in BAT of mice chronically exposed to cold (n=4; mean +/- SEM; t-test; \* P < 0.05 vs. Control).

### Figure S3

Control and Ad-Raptor<sup>KO</sup> mice were kept at thermoneutrality (warm; 30°C) for 2 weeks. Following the adaptation, mice were fasted and cold-exposed for 6 hours (A, B and D, E) or for 14 days (C) before dynamic PET scan procedures or tissue analyses. (A) Representative PET images of extraction coefficient uptake of the glucose analog <sup>18</sup>F-FDG between 25-30 min post-injection (last frame). White arrows point to the interscapular BAT. The white square in the right corner specifically highlights this region. (B) (Left) Glucose extraction coefficient was determined using Patlak graphical analysis following a 30-minutes dynamic scan. (Right) Total dynamic glucose uptake corrected for tissue weight was calculated from the extraction coefficient, BAT weight and plasma glucose levels (n=3; mean +/- SEM; t-test; \*\*\* P < 0.001). (C) Inguinal WAT (iWAT) total dynamic glucose uptake (left) and epididymal WAT (eWAT) total dynamic glucose uptake (right) corrected for tissue weight was calculated from the extraction coefficient, iWAT and eWAT weight and plasma glucose levels (n=4-5; mean +/- SEM; t-test; \* P < 0.05). (D) Representative PET images of extraction coefficient uptake of the fatty acid analog <sup>18</sup>F-FTHA between 25-30 minutes post-injection (last frame). White arrows point to BAT. The white square in the right corner specifically highlights this region. (E) (Left) NEFA extraction coefficient was determined using Patlak graphical analysis following a 30-minutes dynamic scan. (Right) Total dynamic NEFA uptake corrected for tissue weight was calculated from the extraction coefficient, BAT weight and plasma NEFA levels (n=4-5; mean +/- SEM; t-test).

### Figure S4

Control and Ad-Raptor<sup>KO</sup> mice were cold exposed for 14 days and fasted during 6 hours before BAT collection. (A) Triacylglycerol (TG) species measured by metabolomics that were significantly different between control and Ad-RaptorKO mice. Metabolites in bold are statistically different between control and Ad-RaptorKO mice (n=3; t-test; \* P < 0.05). (B) Triacylglycerol (TG) species measured by metabolomics that were not significantly different between control and Ad-RaptorKO mice. (n=3; t-test).

### Figure S5

Control and Ad-Raptor<sup>KO</sup> mice were cold exposed for 14 days and fasted during 6 hours before BAT collection. (A) alpha-Ketoglutarate levels measured by metabolomics (n=3; mean +/- SEM; t-test; \* P < 0.05). (B) Glutamate and glutamine levels measured by metabolomics (n=3; mean +/- SEM; t-test; \* P < 0.05).

### Figure S6

Integrative transcriptomics and metabolomics metabolic pathways following chronic cold exposure.

### Figure S7

Control and Ad-Raptor<sup>KO</sup> mice were cold exposed for 14 days and fasted during 6 hours before BAT collection. Gene expression of (A) *Adrb1* and (B) *Adrb2* (n=4; mean +/- SEM; Two-way ANOVA; \* P < 0.05 vs. Warm; ### P < 0.001 vs. Control).

**Figure S1**

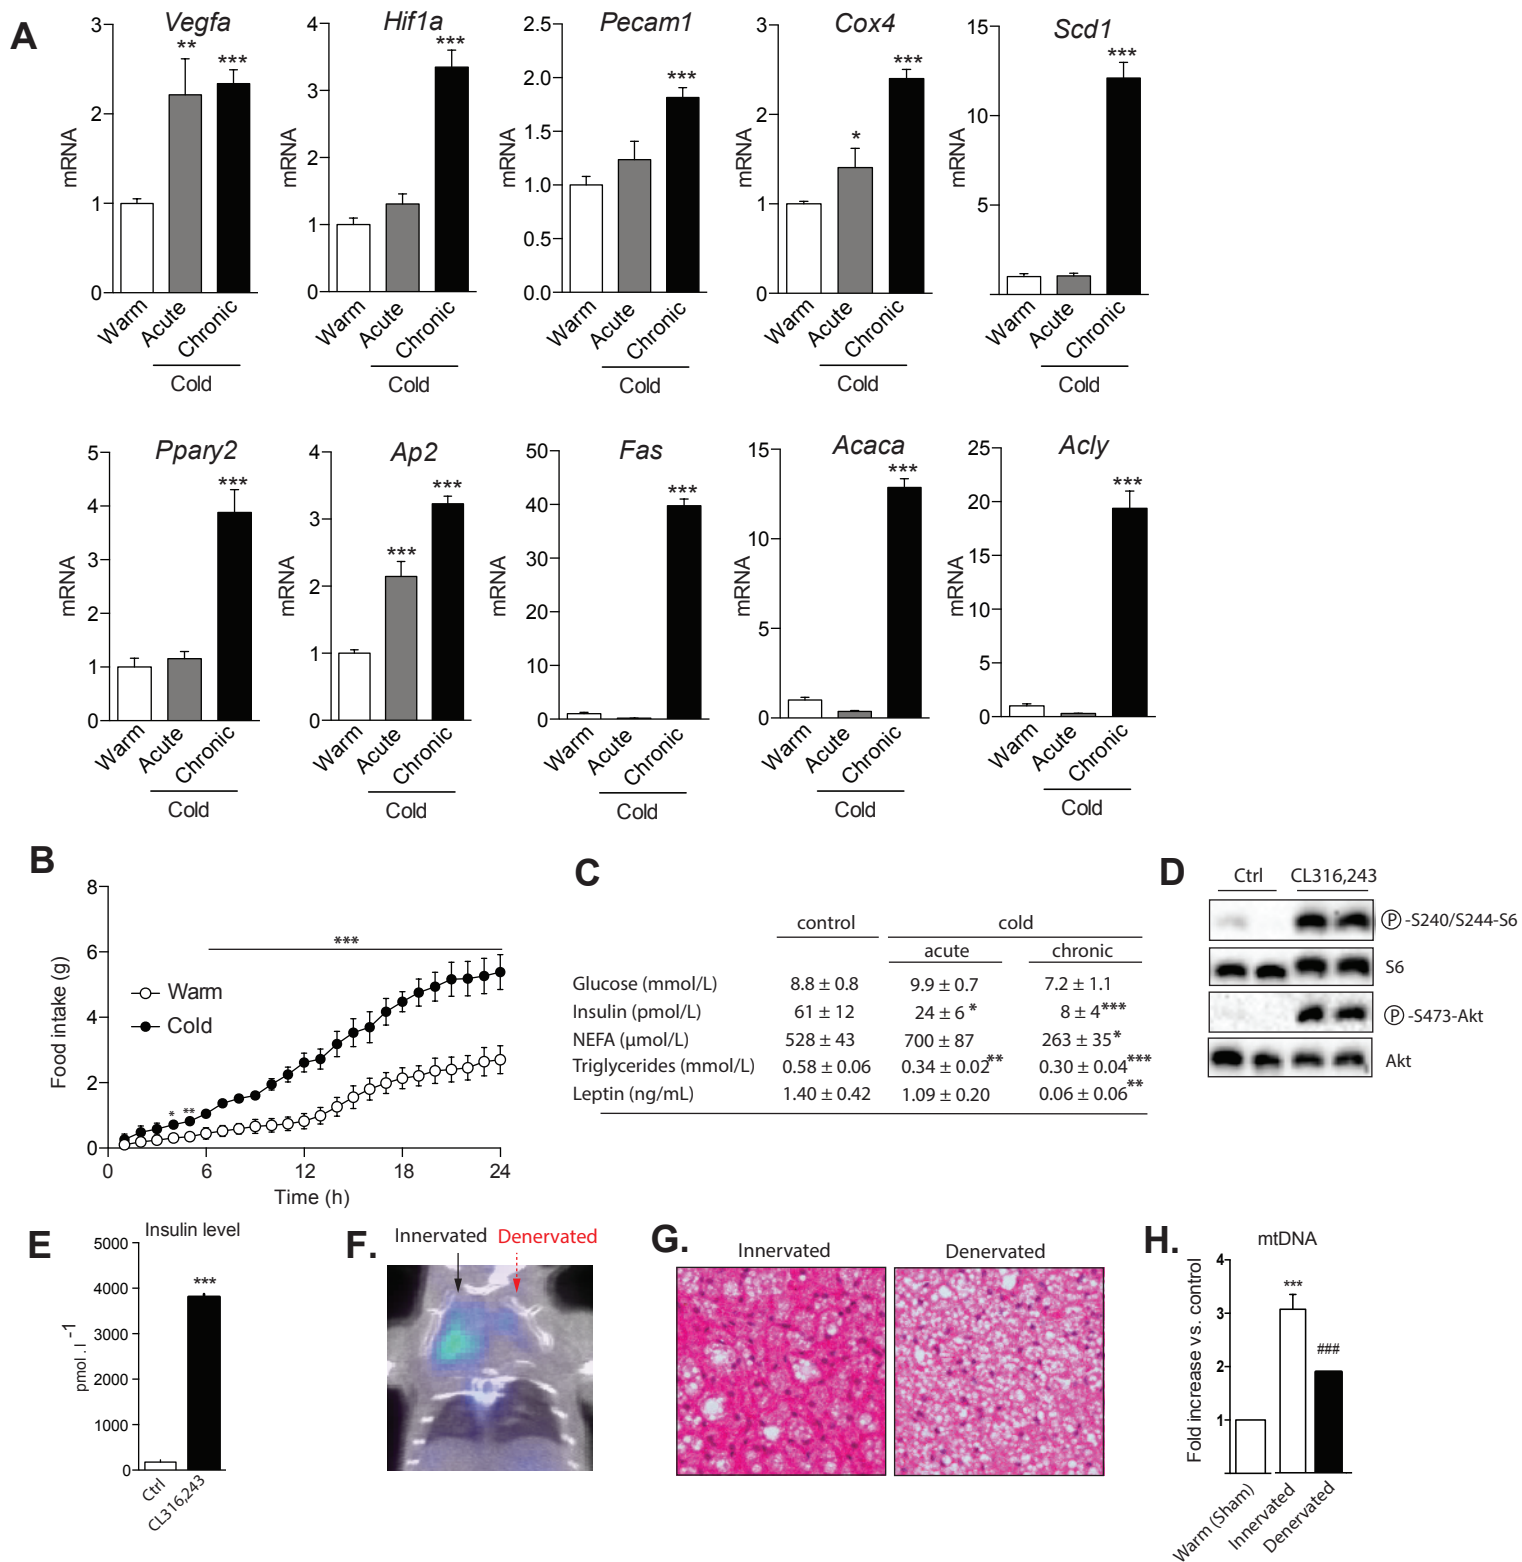

# Figure S2

**A.**

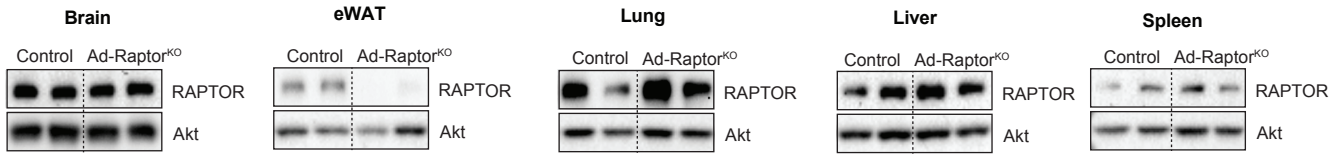

**B.**

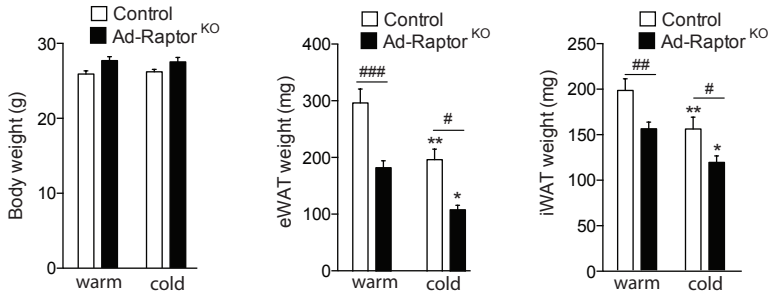

**C.**

|                        | Control     |                          |                            | Ad-Raptor <sup>KO</sup>    |                                     |                                      |
|------------------------|-------------|--------------------------|----------------------------|----------------------------|-------------------------------------|--------------------------------------|
|                        | warm        | cold                     |                            | warm                       | cold                                |                                      |
|                        |             | acute                    | chronic                    |                            | acute                               | chronic                              |
| Glucose (mmol/L)       | 9.7 ± 0.5   | 9.9 ± 0.8                | 10.3 ± 0.9                 | 10.4 ± 0.5                 | 9.9 ± 0.9                           | 6.4 ± 0.5 <sup>&amp;&amp;&amp;</sup> |
| Insulin (pmol/L)       | 49 ± 10     | 14 ± 4                   | 7 ± 3 <sup>*</sup>         | 136 ± 36 <sup>###</sup>    | 14 ± 4 <sup>&amp;&amp;&amp;</sup>   | 18 ± 7 <sup>&amp;&amp;&amp;</sup>    |
| NEFA (μmol/L)          | 608 ± 76    | 863 ± 81 <sup>*</sup>    | 436 ± 14                   | 364 ± 18 <sup>#</sup>      | 835 ± 81 <sup>&amp;&amp;&amp;</sup> | 294 ± 32                             |
| Triglycerides (mmol/L) | 0.52 ± 0.03 | 0.41 ± 0.02              | 0.31 ± 0.03 <sup>**</sup>  | 0.43 ± 0.07                | 0.34 ± 0.02                         | 0.40 ± 0.04                          |
| Leptin (ng/mL)         | 1.53 ± 0.32 | 0.93 ± 0.18 <sup>*</sup> | 0.11 ± 0.04 <sup>***</sup> | 0.44 ± 0.11 <sup>###</sup> | 0.49 ± 0.17                         | 0.12 ± 0.05 <sup>&amp;&amp;</sup>    |

**D.**

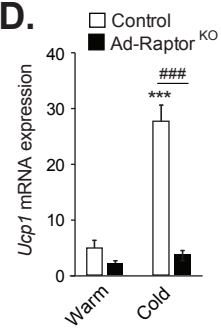

**E.**

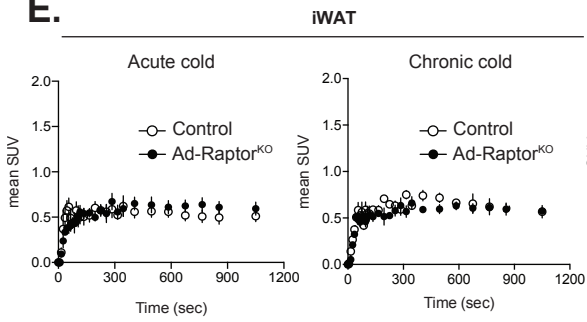

**F.**

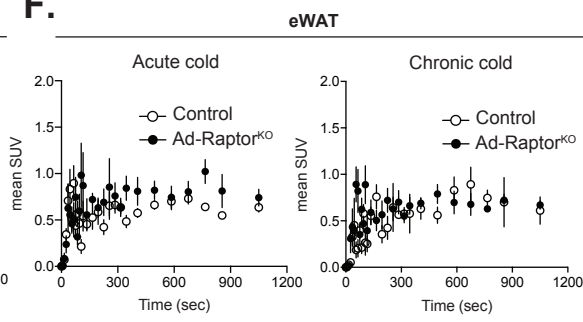

**G.**

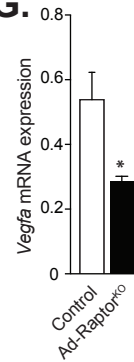

Figure S3

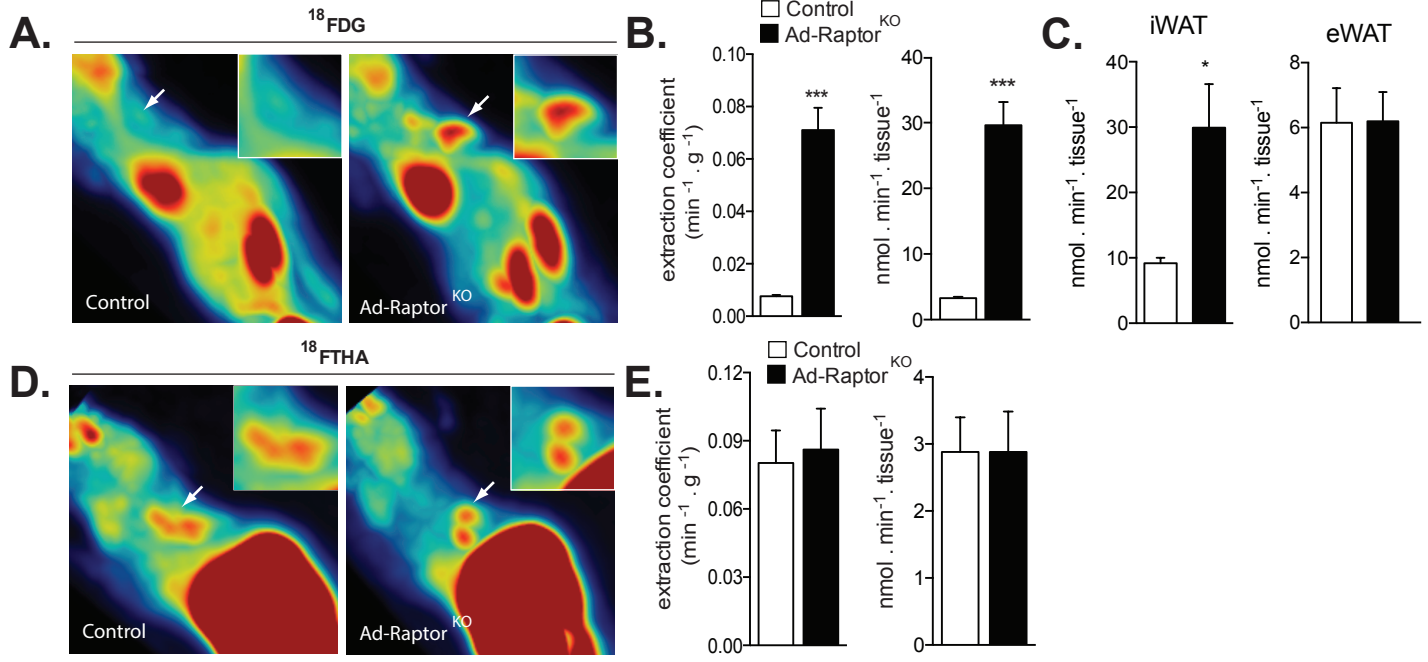



Figure S4

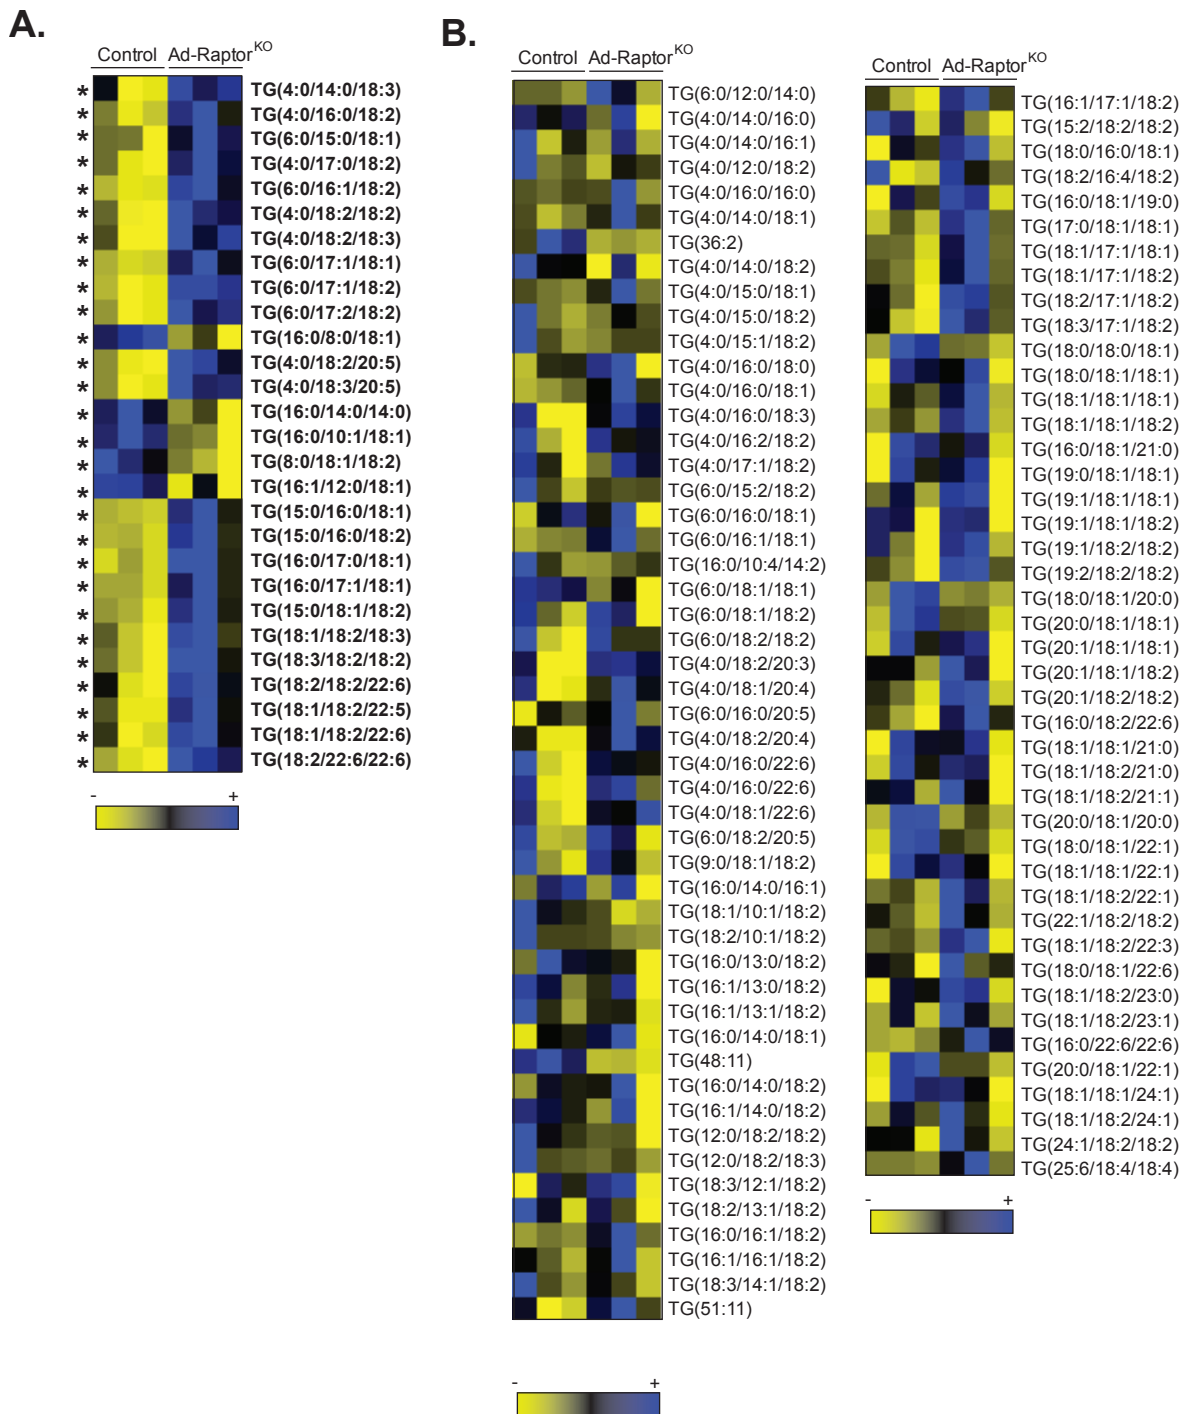

**Figure S5**

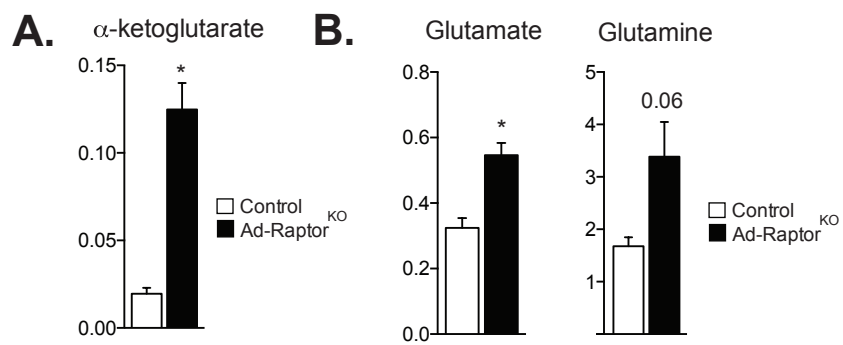

Figure S6

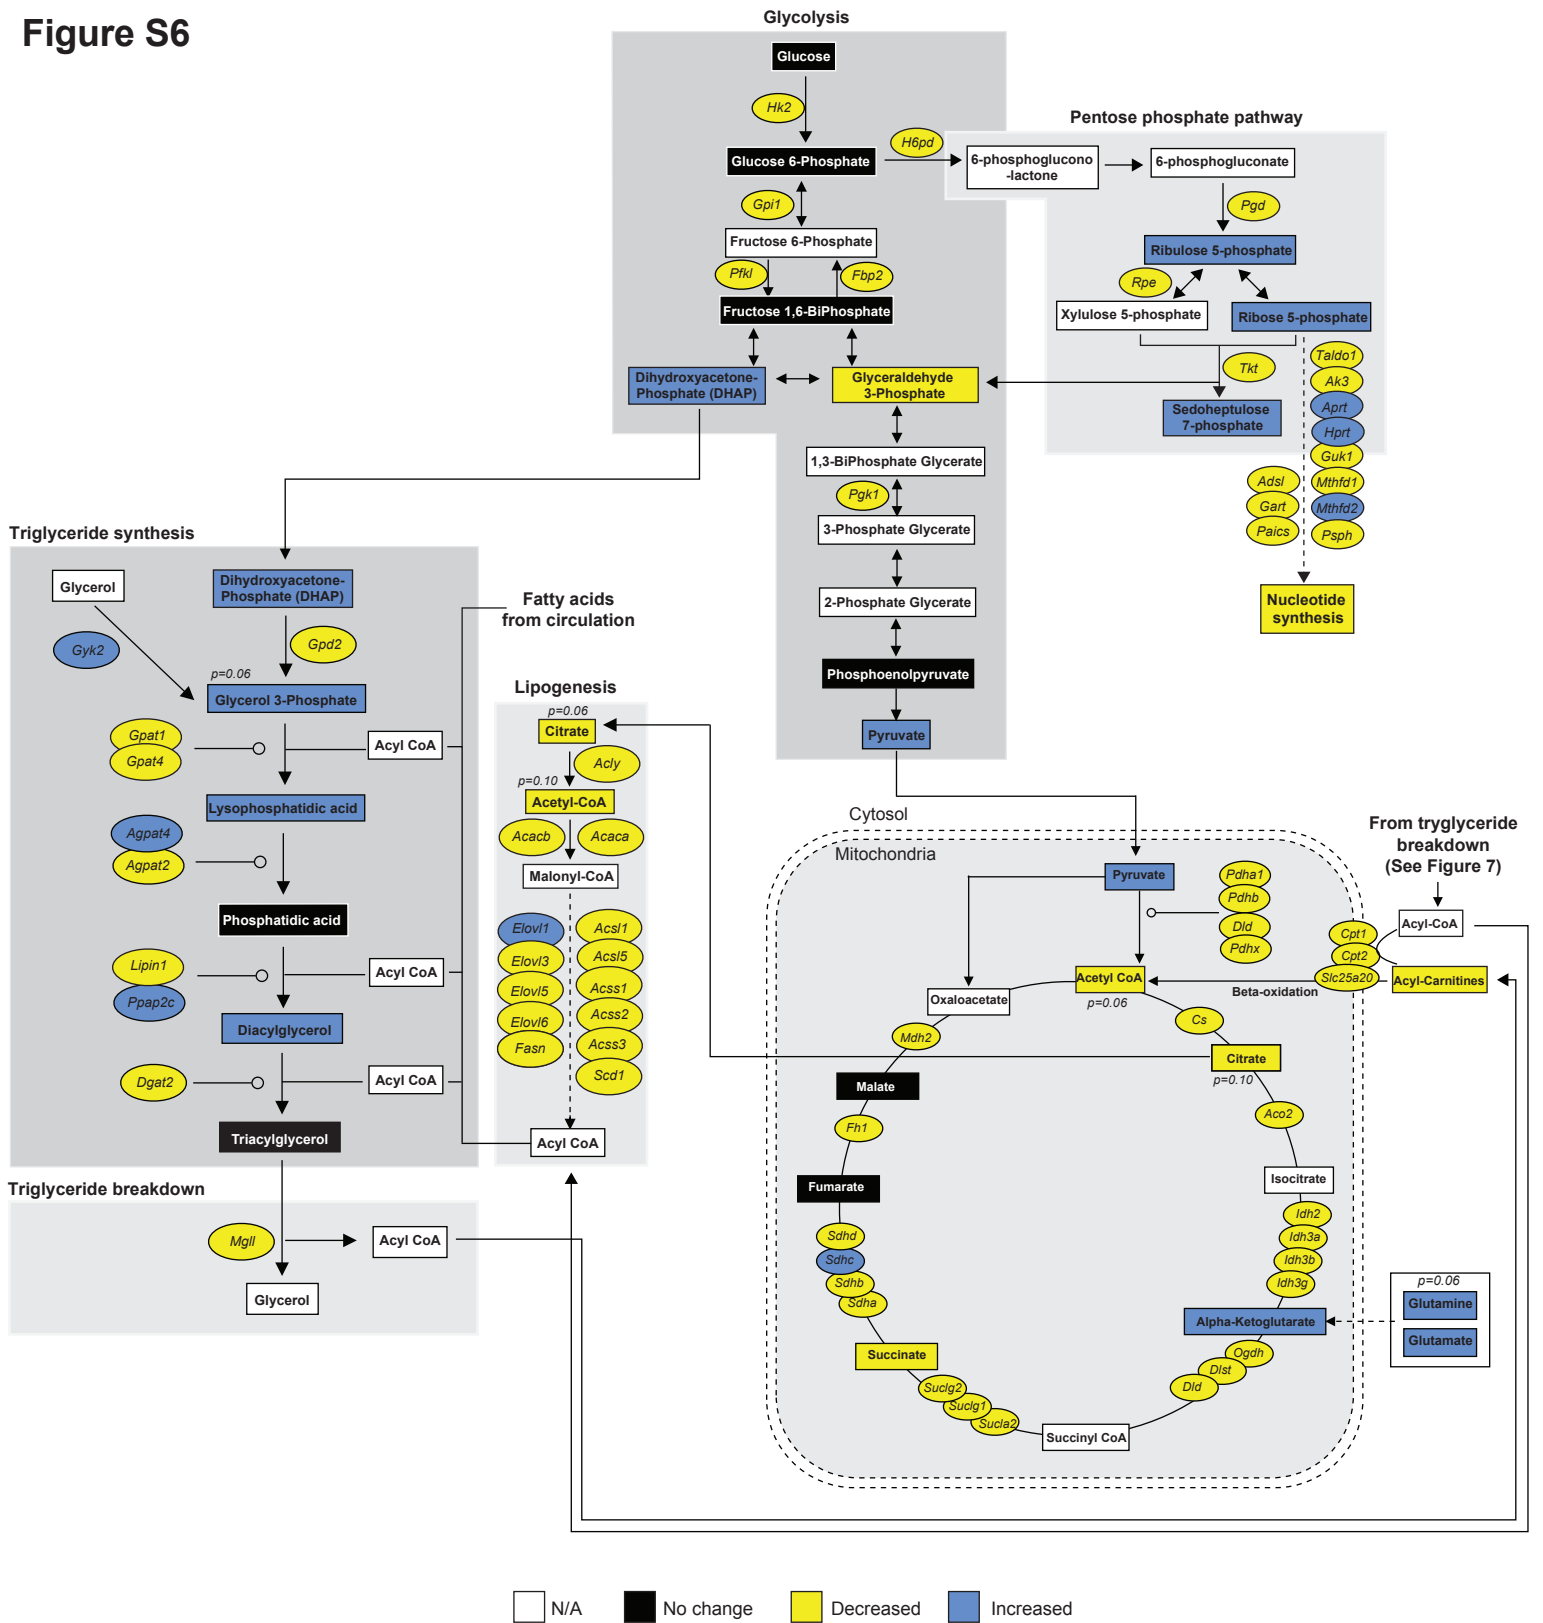

**Figure S7**

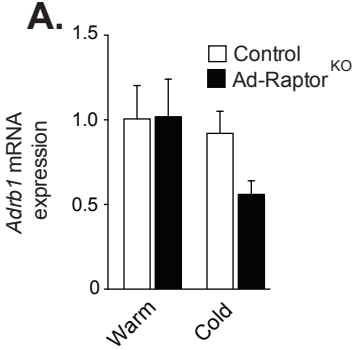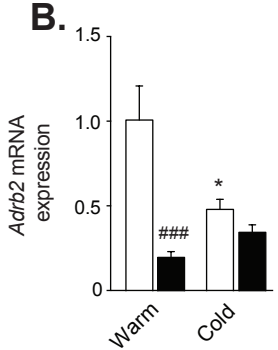

Supplement: srep37223-s1.pdf [file srep37223-s1.pdf]
